# Supplementary material for: Effect of Escalating Financial Incentive Rewards on Maintenance of Weight Loss: A Randomized Clinical Trial
Source: PubMed Central journal article supplement (PMC6826643; doi:10.1001/jamanetworkopen.2019.14393), 2019-11-01
Supplement: jamanetwopen-2-e1914393-s001.pdf [file jamanetwopen-2-e1914393-s001.pdf]

1 **Escalating financial incentive rewards for maintenance of weight loss: an internet-based randomized**  
2 **controlled trial**

3

4 Trial Registration: clinicaltrials.gov Identifier NCT01900392; <https://clinicaltrials.gov/ct2/show/NCT01900392>

5

6 William S. Yancy Jr., MD, MHSc<sup>1,2,3</sup>; Pamela A. Shaw, PhD<sup>4,5</sup>; Catherine Reale, BS<sup>5,6,7</sup>; Victoria Hilbert, MPH,  
7 RD<sup>5,8</sup>; Jiali Yan, MS<sup>9</sup>; Jingsan Zhu, MS, MBA<sup>5,8</sup>; Andrea B. Troxel, ScD<sup>10</sup>; Gary D. Foster, PhD<sup>11,12,13</sup>; Kevin G.  
8 Volpp, MD, PhD<sup>5,6,8,9,14</sup>

9

10 January 24, 2018; Version 5

11

12 Funding: This study is funded through National Institute On Aging of the National Institutes of Health, Award  
13 Number R01-AG045045 (Volpp and Yancy, MPIs).

14

15 1. Duke University Diet and Fitness Center, Durham, NC

16 2. Department of Medicine, Duke University School of Medicine, Durham, NC

17 3. Center of Innovation to Accelerate Discovery and Practice Transformation (ADAPT), Department of Veterans  
18 Affairs, Durham, NC

19 4. Department of Biostatistics, Epidemiology and Informatics, Perelman School of Medicine, University of  
20 Pennsylvania, Philadelphia, PA

21 5. Leonard Davis Institute Center for Health Incentives and Behavioral Economics, University of Pennsylvania  
22 Perelman School of Medicine, Philadelphia, PA

23 6. Department of Health Care Management, The Wharton School, University of Pennsylvania, Philadelphia, PA

24 7. Center for Clinical Epidemiology and Biostatistics, Perelman School of Medicine, University of Pennsylvania,  
25 Philadelphia, PA

26 8. Department of Medical Ethics and Health Policy, Perelman School of Medicine, University of Pennsylvania,  
27 Philadelphia, PA

28 9. Department of Medicine, Perelman School of Medicine, University of Pennsylvania, Philadelphia, PA

- 29 10. Department of Population Health, New York University School of Medicine, New York, NY
- 30 11. Department of Science, WW (formerly Weight Watchers), New York, NY
- 31 12. Center for Obesity Research and Education, Temple University, Philadelphia, PA
- 32 13. Center for Weight and Eating Disorders, Perelman School of Medicine, University of Pennsylvania,
- 33 Philadelphia, PA
- 34 14. Center for Health Equity Research & Promotion, Philadelphia Veterans Affairs Medical Center, Philadelphia,
- 35 PA

36  
37

### 38 **Study Instruments**

39 The proposed study will evaluate the effectiveness of financial incentives in improving maintenance of weight loss.

40 We propose a 2-phase, 2-arm randomized controlled trial (RCT) in which 259 participants who lose at least 5

41 kilograms (11 pounds) in a weight loss program will be randomized to receive one of the following: 1) daily weigh-

42 ins and weekly feedback (control arm) or 2) daily weigh-ins, weekly feedback, and a weekly escalating lottery-based

43 financial incentive (Phase I, months 1-6). Those assigned to the escalating lottery condition will be eligible to win

44 lotteries worth an expected value of \$3.98 in week 1 that will increase by \$0.43 per week for each week that they

45 achieve the goal of weighing 6/7 days. Participants in all arms will be observed without intervention in Phase II.

46  
47

### 48 **Method for Assigning Subjects to Groups**

49 Potential participants will be identified by reviewing Weight Watchers online member records using

50 our eligibility criteria of initial BMI upon entry into the program, pounds lost in the last 4-6 months, and

51 member opted in for communications from Weight Watchers about research studies. Weight Watchers will facilitate

52 communication to these members using existing communication channels (email). Potentially eligible individuals

53 will be invited to visit the Way to Health portal, an NIH-funded web-based infrastructure based at the University

54 of Pennsylvania that is used to run behavioral economic intervention studies. Participants meeting the inclusion

55 criteria will be randomized to one of the 2 study arms through the Way to Health platform. We will use permuted

56 block randomization with variable block sizes. Participants are randomized in a 1:1 ratio to the

57 intervention or control arm and randomization will be stratified by: (1) sex and (2) amount of weight  
58 lost within first 4-6 months of Weight Watchers membership (<30 lbs. versus 30+ lbs), as  
59 baseline weight loss may moderate treatment effects. Prior to a participant signing the informed  
60 consent, both the participant and the study coordinator will be blinded to what their potential group assignment  
61 of the participant would be if enrolled. Once consented and enrolled, neither the participants nor the study  
62 coordinator will be blinded to condition assignment due to the nature of the interventions. However, the consent  
63 form will not elucidate the design of the two intervention arms so that participants are not aware of the  
64 comparisons being made. For scientific purposes to establish valid measures of the effects of the various kinds of  
65 incentive plans, blinding participants to the overall study design is necessary, presents no increment of risk, and  
66 doesn't violate subject rights. Once a subject has been assigned to a study arm, she will receive an  
67 automatically-generated email notification about group assignment and next steps. At the close of the study, all  
68 participants will receive a debriefing letter disclosing all study arms and informing participants of the final  
69 results of the study (using de-identified data) that will be submitted for publication to an academic journal at the  
70 completion of the analysis.

71

## 72 **Administration of Surveys and/or Process**

73 Basic demographic data (BMI, gender, race, education, income, household size), physical activity data (IPAQ  
74 long), and eating behavior questions (TFEQ) and 2 questions measuring delayed gratification will be collected upon  
75 enrollment. We will also collect this data, minus the demographic questions, at 6 and 12 months.

76

## 77 **Protocol**

78

## 79 **Abstract**

80 Obesity is the second leading cause of preventable death in the United States, (1) associated with high blood  
81 pressure (BP), type 2 diabetes, coronary heart disease, and osteoarthritis. Identifying effective strategies for treating  
82 obesity is both a clinical challenge and a public health priority. Over 70% of the U.S. population is overweight or  
83 obese, and obesity in middle age translates into higher rates of hospitalization, Medicare expenditures, disability,  
84 and mortality risk in subsequent years. While a variety of approaches are successful in achieving initial weight loss,

85 techniques for maintenance of initial weight loss have largely been unsuccessful.

86

87 Our previous work examining the impact of different degrees of cost sharing on employee participation,  
88 engagement, and ongoing weight loss showed that among Weight Watchers members who had initial success in  
89 losing at least 5% of their initial body weight, the majority regained weight over the subsequent 6 months; Weight  
90 Watchers members in general were at high risk of dropping out of the program altogether perhaps due to lack of  
91 success in losing weight and keeping it off (John et al 2015). Research has shown that the frequency of self-  
92 weighing is important for both prevention of weight gain and weight loss (Wing et al NEJM 2006; 355:1563-1571;  
93 Linde JA et al Ann Behav Med 2005; 30: 210-216). This study will build on our successful efforts using incentives  
94 for weight loss to test scalable ways of increasing the frequency of self-weighing among Weight Watchers members  
95 who had initial success in losing weight. This 2- arm randomized controlled trial will compare the relative  
96 effectiveness and cost-effectiveness of (1) weekly feedback without incentives to (2) weekly escalating lottery-based  
97 incentives among patients who successfully lost at least 5 kg over 4-6 months during participation in Weight  
98 Watchers (Pre Phase). Incentives will be provided to some study participants (Arm 2) for the first 6 months (Phase  
99 I), and then participants will be followed for 6 more months to examine effects following cessation of incentives  
100 (Phase II). A total of 259 participants will be randomized into the 2 arms.

101

#### 102 Specific Aims

103 Aim 1: Among participants who lose 5 kg or more of baseline weight prior to randomization, assess the  
104 effectiveness of escalating lottery rewards, relative to the control group, on maintenance of weight loss over the  
105 ensuing 6 months (Phase I).

106

107 Aim 2: Assess the degree to which weight loss is maintained in the intervention group relative to usual care during  
108 the 6 months following the cessation of the interventions (Phase II).

109

110

#### 111 Objectives

112 Overall objectives

113 1. Among participants who lose 5 kg or more of baseline weight prior to randomization, assess the effectiveness of  
114 escalating lottery rewards, relative to the control group, on maintenance of weight loss.

115 2: Assess the degree to which weight loss is maintained in the intervention groups relative to usual care during the 6  
116 months following the cessation of the interventions (Phase II).

117

118 **Primary outcome variable**

119 Pounds of weight lost at the end of 6 months

120

121 **Secondary outcome variables**

122 1. Pounds of weight lost at the end of 12 months

123 2. Percent of individuals who maintained their weight (defined as gaining no more than 1.36 kg or 3 lbs) at 6 and 12  
124 months

125 3. Average weekly weigh-in frequency during Phase I

126 4. Average weekly weigh-in frequency during Phase II

127 5. Linear trend for weigh-in frequency during Phase I

128 6. Linear trend for weigh-in frequency during Phase II

129 7. Self-reported physical activity at 6 months, as measured by total MET-minutes/week, total minutes in Moderate to  
130 Vigorous Activity (MVPA), and minutes/week walking

131 8. Self-reported physical activity at 12 months, as measured by total MET-minutes/week, total minutes in Moderate  
132 to Vigorous Activity (MVPA), and minutes/week walking

133 9. Eating behavior at 6 months (cognitive restraint, uncontrolled eating, emotional eating)

134 10. Eating behavior at 12 months (cognitive restraint, uncontrolled eating, emotional eating)

135 11. Proportion of the time people fall off the lottery escalation ladder

136 12. Number of resets to beginning for the lottery winnings

137

138 **Exploratory outcome variable**

139 Frequency of weight self-reported to Weight Watchers online

140

141  
142  
143  
144  
145  
146  
147  
148  
149  
150  
151  
152  
153  
154  
155  
156  
157  
158  
159  
160  
161  
162  
163  
164  
165  
166  
167  
168

**Background**

Obesity is the second leading cause of preventable death in the United States, associated with high blood pressure (BP), type 2 diabetes, coronary heart disease, and osteoarthritis. Weight loss of just 5-10 kg can improve risk factors (e.g., BP, glycemia, and serum lipid levels) and reduce the incidence of diabetes. In older adults, weight loss interventions have shown clear improvements in BP, arthritis, and functional status. However, maintenance of weight loss is needed to achieve long term health benefits, and successful strategies for long-term maintenance are lacking. Weight regain after a period of intentional weight loss is widely observed with all interventions due to loss of motivation, lack of sustained rewards for weight loss behavior, difficulty adhering to diet, and need for ego-depleting exertion of willpower. For maximum generalizability, we will enroll study participants from Weight Watchers [WW]), the largest commercial weight loss program nationally. Since this program, like other successful weight loss interventions, has difficulty with weight loss maintenance, an external motivational source such as financial incentives may help people keep weight off better than standard approaches. Individuals put disproportionate value on the present relative to future costs and benefits, known as present-biased preferences. While this bias typically works against healthy behavior, the same factors can be used to promote compliance by providing tangible but small immediate rewards for beneficial behaviors. The literature most relevant to obesity interventions relates to the impact of incentives on addiction-related behaviors, which, like diet, are difficult to change and involve a conflict between an individual's long-term well-being and short-term cravings. As reported in the Contingency Management literature, financial incentives have been highly effective for such patients, leading to higher rates of program retention and abstinence. However, the most effective approaches are those that require monitoring several times a week, suggesting the importance of frequent feedback. A review of 11 randomized trials of financial incentives found that financial incentives promoted adherence better than any tested alternative, leading to better blood pressure control, appointment attendance, and higher immunization rates. Other reviews have found various incentives (including lotteries) effective in changing behavior. However, few studies have examined cost-effectiveness or longer-term effects of incentives on health behaviors after cessation of incentives, or the relative effectiveness of traditional economic incentives versus behavioral economic incentives that consider the underlying psychology of decision making. The most compelling early work on incentives for weight loss was done by Dr. Robert Jeffery. He showed

169 that participants without any weight management training lost weight when they deposited valuables with a  
170 therapist with return of their valuables contingent on progress towards pre-specified goals, and that incentives for  
171 weight loss are more effective than incentives for attending weight loss training sessions. Finkelstein et al. found  
172 that over a 3-month period, participants offered  
173 \$14 per percentage point of weight loss lost 4.7 pounds whereas participants offered \$7 lost 3.0 pounds and  
174 control participants lost 2.0 pounds. Incentives for maintenance of weight loss (\$10 for participants who gained  
175 weight) demonstrated higher rates of maintaining weight loss that were not statistically significant. These  
176 studies illustrate that incentives, even if small and infrequent, can be effective; higher rewards and more frequent  
177 feedback could substantially enhance these effects. Recent studies concluded that annual US expenditures  
178 attributable to overweight and obesity are between \$90 and  
179 \$100 billion. Among nationally representative cohorts, the average annual incremental cost of obesity per person is  
180 about \$1308. Higher BMIs in young adulthood and middle age are associated with substantially higher Medicare  
181 expenditures in old age. Higher BMI also translates into significantly higher health care charges within 18  
182 months, suggesting that health plans may find it cost effective to invest in behavior modification to lower health  
183 expenditures. Several economic assessments of behavioral interventions for weight loss have been published.  
184 The Diabetes Prevention Program, reported that, compared to placebo, the intensive lifestyle intervention had  
185 cost per QALY ratios ranging between \$32,000 and  
186 \$52,000, depending upon whether direct medical costs alone or direct and indirect costs were counted. A  
187 comparison of low carbohydrate and low fat diets by Glick et al suggested that low carbohydrate diets may be  
188 cost effective. Finkelstein et al. reported that the 1-year incremental cost per 1% reduction in 10-year CHD risk  
189 associated with an enhanced behavioral intervention was \$637. The substantial health and economic  
190 consequences of obesity highlight the importance of testing new approaches to maintenance of weight loss and  
191 the potential cost effectiveness of successful interventions.

192

### 193 *Study Design*

194

#### 195 **Design**

196 Study participants will be obese (at time of enrollment in Weight Watchers) volunteers recruited from a major

197 community-based weight loss program (Weight Watchers (WW)), who have lost at least 5 kg over their first  
198 4-6 months in the program. Eligible participants will be randomized to a control group (weekly feedback via  
199 text and email messaging and regular measurement of weight for 6 months), or an escalating lottery-based  
200 financial incentive. Participants will be asked to weigh in on a digital scale 6/7 days each week. Participants in the  
201 incentive arm will be eligible for weekly winnings based on weighing 6/7 days each week  
202 and will receive weekly feedback on their winnings to keep weighing goals salient. Participants in both  
203 arms will receive weekly tips on how to make weighing in frequently easier to do. There will be some  
204 diet & exercise-related tips mixed in with weighing in frequently tips. Between months 7-12 (Phase II)  
205 participants will receive no further incentives tied to weighing, nor will they receive a weekly tip. The study is  
206 powered to test the effectiveness of the intervention arm relative to control.

207

#### 208 **Study duration**

209 We estimate it will take 9 months to enroll 259 participants. The intervention will last for 6 months. We will  
210 remove the intervention and observe changes in weight over the subsequent 6 months for a total length of  
211 participation of 12 months.

212

213

214

#### 215 **Characteristics of the Study Population**

216

##### 217 **Target population**

218 Eligible participants will be men and women ages 30 to 80 years who had a BMI of 30 to 45 kg/m<sup>2</sup> prior to  
219 starting Weight Watchers, have a documented weight loss of at least 5 kg in the past 4-6 months, are in  
220 stable health, and have an online Weight Watchers membership.

221

222

##### 223 **Accrual**

224 Weight Watchers has over 1 million members. Weight Watchers will send invitations to their online members that



225 meet our inclusion criteria and opted in for communications from Weight Watchers about research studies. Given  
226 the large pool of potential participants, we should be able to recruit 259 participants in 9 months.

227

### 228 **Key inclusion criteria**

229 (1) Individuals ages 30 to 80 years (2) BMI of 30 to 45 kg/m<sup>2</sup> prior to starting Weight Watchers (3) Have a  
230 documented weight loss of at least 5 kg in the first 4-6 months of joining Weight Watchers; (4) In stable health;  
231 (5) Have an online Weight Watchers membership. The age range represents those ages most affected by obesity in  
232 terms of prevalence, and of associated disease, disability, and healthcare costs. Instead of targeting only older  
233 adults, we extend the lower age range to 30 years because obesity in middle age has a strong association with  
234 disability in later years. The upper limit of BMI will minimize the influence of outliers on the main result of  
235 weight loss and maximize the effect of incentives.

236

### 237 **Key exclusion criteria**

238 substance abuse; bulimia nervosa or related behaviors; pregnancy or breast feeding; medical contraindications  
239 to counseling about diet, physical activity, or weight reduction; unstable mental illness; screen positive for  
240 pathologic gambling on the basis of the 2 item Lie-Bet criteria (excluded if meets 1 or both criteria). Individuals  
241 unable to read consent forms or fill out surveys in English will be excluded.

242

243

### 244 **Subject recruitment**

245 Potential participants will be identified by Weight Watchers using our inclusion criteria. Weight Watchers will  
246 facilitate communication to these members using existing communication channels (email). Potentially eligible  
247 individuals will be invited to visit the Way to Health portal, an NIH-funded web-based infrastructure based at the  
248 University of Pennsylvania that is used to run behavioral economic intervention studies. Interested participants  
249 will be directed to the Way to Health platform where they will provide informed consent. These individuals will  
250 also be asked to enter data related to eligibility and their demographic and clinical characteristics through the Way  
251 to Health internet portal.

252

253

254 To enhance retention, we will provide a total of \$100 to participants in all arms. Participant compensation  
255 will be independent of degree of weight loss and randomization group as follows: \$50 for completing an online  
256 survey at the end of month 6 and at the end of month 12. All participants will also receive a free scale  
257 (value \$179). All payments will be approved electronically from the Way to Health platform. Payment  
258 information will be sent to Wells Fargo to process and sent to participants via check. Participants will  
259 receive an automated message from the Way to health platform notifying them of compensation after completing  
260 each required survey. Participants in the financial incentive arm of the study will receive additional payments based on  
261 their adherence to daily weighing at home as outlined below in Study Procedures.

262

263

## 264 **Statistical Methods**

265

### 266 **Sample size justification**

267

268 We have designed the study with adequate power to detect differences in maintenance of initial weight loss. Our  
269 intervention should achieve its maximal impact in maintaining initial weight loss at the end of Phase I, when the  
270 incentive payments cease. The primary analysis will be an intent-to-treat analysis that compares the weight loss at 6  
271 months between the lottery and control arms, using a t-test at the 0.05 level for significance. Assuming 20%  
272 missingness, a 5 kg (11 lb) SD for weight change at 6 months, and at least 5 lb more weight loss for the intervention  
273 arm compared to control at 6 months, we will have at least 90% power to detect the improvement in our primary  
274 outcome.

275

### 276 **Analytic approach**

277

#### 278 *Primary and key secondary outcomes*

279

280 The primary analysis will be an unadjusted between-arm comparison of the change in weight from baseline

281 (randomization) to 6 months, using a t- test performed at the 0.05 significance level. The primary analysis will be  
282 done as an intent-to-treat (ITT) analysis, including each participant in the group to which she was randomized,  
283 regardless of adherence to the assigned intervention. The 6-month weight is determined as the first weight that is  
284 inside the 6-month visit window. A multiple imputation strategy based on baseline covariates (including study arm)  
285 will be used to fill in the missing data for the primary outcome. For more details see multiple imputation strategy  
286 below. A complete case analysis will be done as a sensitivity analysis. A second sensitivity, assuming weight  
287 returned to baseline (weight at time of randomization) may also be considered. We will also estimate the difference  
288 between arms at 6-month in an adjusted analysis where the change from baseline is regressed in a linear model on  
289 study arm, baseline weight, and other covariates including age, sex, race, BMI, education, income, and physical  
290 activity (total MET-minutes/week).

291  
292 Analyses of the key secondary outcome, weight change between baseline and 12 months (Phase 2) will be  
293 conducted in a similar manner as the primary outcome. The 12-month weight is determined as the weight that is the  
294 first weight inside the 12-month visit window. The multiple imputation algorithm for the 12-month outcome will  
295 additionally consider the 6-month weight outcome as an additional predictor, using a chained imputation type  
296 approach.

297  
298 *Multiple Imputation Strategy*  
299 Missing primary outcome data, weight at 6 months, will be imputed using baseline covariates only (Imputation A);  
300 variables include age, sex, race, weight, BMI qualifying weight loss, education, income, IPAQ activity level, MET-  
301 minutes walking, the three domains of eating behaviors (cognitive restraint, uncontrolled eating, emotional eating,  
302 and two scores related to delayed gratification behavior. A supportive analysis will also be done also using post-  
303 randomization variables (Imputation B); these variables include the most recent logged weight and time since last  
304 weight, The imputation strategy for the weight at 12 months and other secondary outcomes will proceed in a similar  
305 manner. Weight at 12 months will additionally use the 6-month weight outcome, using chained imputation approach  
306 (1).

307  
308 Analysis of other outcomes

309

310 The trend over time for the frequency of at-home weight measurements will be compared between arms using a  
311 generalized estimating equation (GEE) with an autoregressive (AR-1) working correlation model; specifically the  
312 mean number of days out of 7 is modeled and compared among study arms adjusting for study week and a week-by-  
313 arm interaction. Separate models will be fit for Phases 1 and 2. A linear mixed effects model with random intercept  
314 and slope for week will also be considered. An overall average weekly frequency of weighing in will be compared  
315 between arms for Phase I and Phase II using a similar GEE approach.

316

317 Additional secondary analyses include a between-arm comparison of the percent of individuals who maintained their  
318 weight (defined as gaining no more than 1.36 kg or 3 lbs) at 6 and 12 months. We will consider whether the amount  
319 of weight gain is correlated with the average number of times per week participants weighed themselves in a cross-  
320 sectional analysis at 6 and 12 months. Comparisons will also be made of the changes in self-reported physical  
321 activity and the three domains of eating behaviors (cognitive restraint, uncontrolled eating, emotional eating) at 6  
322 months and 12 months after initial weight loss. Descriptive analyses will be done to examine the proportion of the  
323 time people fall off the lottery escalation ladder and the number of resets to beginning for the lottery incentive arm.  
324 All secondary analyses will follow in a manner similar to the primary analysis, considering both an unadjusted and  
325 adjusted approach. Imputation models for the secondary outcomes will include as predictors the baseline value for  
326 that outcome and the other baseline covariates considered for the imputation strategy A model, as described above.  
327 For secondary outcomes with < 10% data missing data, only a single imputation strategy (imputation A) may be  
328 considered.

329

### 330 Exploratory Analyses

331 We will summarize the frequency of the self-reported weights in Phase I and Phase II and examine whether there  
332 will be a difference by arm. We will further explore intervention effects and examine whether there may be a  
333 potential interaction between the baseline delayed gratification score and treatment arm.

334

### 335 **Methods: Monitoring**

336 *Data and Safety Monitoring Board*

337

338 A Data and Safety Monitoring Board is an independent group of experts convened to protect the safety of research  
339 subjects and to ensure that the scientific goals of the project are being met.

340 A Data and Safety Monitoring Board (DSMB) will be appointed by and act in an advisory capacity to the National  
341 Institute on Aging (NIA) to monitor participant safety, data quality and to evaluate the progress of the study.

342

#### 343 *DSMB Responsibilities*

344

345 The DSMB will perform several duties:

- 346 1. They will review and approve the research protocol and plans for data and safety monitoring prior to the  
347 study.
- 348 2. They will evaluate the progress of the trial. This will include assessment of data quality, participant  
349 recruitment, accrual and retention, participant risk versus benefit, performance of trial sites, and study  
350 outcomes. This assessment will be performed at meetings every 6 months during the clinical trial and more  
351 frequently if needed.
- 352 3. They will make recommendations to ensure that all of the issues above are appropriately addressed. Study  
353 PIs will be responsible for responding to all recommendations of the DSMB and submitting DSMB reports  
354 to the IRB.

355

#### 356 *DSMB Membership and Affiliation*

357

358 The DSMB will be composed of experts in clinical trials, medical economics, general internal medicine, and  
359 biostatistics, along with the project PI (Dr. Volpp), Dr. Yancy, and Dr. Troxel as non-voting members. Dr. Volpp  
360 will be responsible for maintaining communication between the DSMB and the individual project staff. We consider  
361 the proposed trial to be relatively low risk.

362

363 Therefore, we have arranged for a monitoring committee that is assigned to review the study and staff training  
364 protocols, monitor the trial for safety and adverse events, and conduct semi-annual meetings. These members will

365 not be involved directly with the trial. The members that we propose to serve on this committee and their activities  
366 are:

367

368 • **Philip Greenland, M.D.:** Dr. Greenland is the Harry W. Dingham Professor and Senior Associate Dean  
369 for Clinical and Translational Research at Northwestern University and Director of the Northwestern  
370 University Clinical and Translational Sciences (NUCATS) Institute. He is a well-known expert in the field  
371 of prevention of cardiovascular disease.

372 • **Michael K. Parides, Ph.D.:** Dr. Parides is Professor of Health Policy at the Mount Sinai School of  
373 Medicine, and Director of Biostatistics at the International Center for Health Outcomes and Innovation  
374 Research (InCHOIR) who specializes in clinical trials, linear models and analysis of categorical data, and  
375 has extensive experience in both conducting and monitoring randomized trials, especially in cardiology.

376 • **Allison Rosen, M.D., Sc.D., M.P.H.:** Dr. Rosen is an Associate Professor at the University of  
377 Massachusetts. She is an expert on evaluation of approaches to improving the value of U.S. health care  
378 spending.

379

#### 380 *Adverse Event Monitoring and Surveillance*

381

382 The study will monitor the medical safety of participants. One aspect of this monitoring is to evaluate potential  
383 volunteers at screening to determine whether it is safe for them to participate in the planned intervention.

384 Participants' weight loss will be monitored once they are enrolled in the trial. If a subject has lost too much weight  
385 too quickly, the safety of continuing or resuming participation in the study will be determined by the participant's  
386 PCP in conjunction with the study medical monitor and Principal Investigators. An alert will trigger to the clinical  
387 research coordinator if a participant has lost more than 10 pounds in one week or 20 pounds in a month.

388

#### 389 *Adverse Event Surveillance*

390 According to the *Penn Manual for Clinical Research*, Adverse Events are events that:

- 391 • Are unanticipated **--and--**
- 392 • Suggest that participants or others are at greater risk of harm than was

393 previously known or recognized.

394 This definition specifically includes the following:

- 395 • Information that indicates a change to the risks or potential benefits of the research, in terms of severity or  
396 frequency.
- 397 • Breach of confidentiality.
- 398 • Incarceration of a participant when the research was not previously approved under Subpart C and the  
399 investigator believes it is in the best interest of the subject to remain in the study.
- 400 • Events that require prompt reporting to the sponsor.
- 401 • Complaint of a participant when the complaint indicates unexpected risks or the complaint cannot be  
402 resolved by the research team.
- 403 • Protocol violation (meaning an accidental or unintentional change to the IRB approved protocol) that  
404 placed one or more participants at increased risk, or has the potential to occur again.
- 405 • Sponsor-imposed suspension

406

407 *Unexpected/unanticipated*

408

409 An event is classified as “unanticipated” when the specificity or severity is not reflected in the study documents  
410 including the protocol, or informed consent document.

411

412 *Related to Study Procedures*

413

414 The determination of how likely the event is related to the study procedures is made by the principal investigator,  
415 the classification of which may vary. The IRB asks if the event is "more likely than not" related to the study  
416 procedures.

417

418 *Involved Risk to Participants or Others*

419

420 "Participants or others" may involve anyone, including research subjects, research staff, or others not directly

421 involved in the research. The unanticipated problem can occur in either clinical or non-clinical research. "Risks"  
422 include physical, psychological, economic, legal or social consequences.

423

#### 424 *Defining Serious Adverse Events*

425

426 According to the *Penn Manual for Clinical Research*, and as defined by the Food and Drug Administration, serious  
427 adverse events are defined by one of the following:

- 428 • Death
- 429 • Life-threatening experience
- 430 • Inpatient hospitalization or prolongation of hospitalization
- 431 • Persistent or significant disability/incapacity
- 432 • Congenital anomaly/birth defect in the subject's offspring
- 433 • An important medical event that, based upon appropriate medical judgment, may jeopardize the subject and  
434 may require medical or surgical intervention to prevent one of the outcomes listed above.
- 435 •

#### 436 *Periodic Surveillance of Adverse Events*

437

438 Surveillance for SAEs and other relevant clinical events that may be associated with study participation will occur  
439 on an ongoing basis. The planned procedures for minimizing risk to subjects for potential side effects of the  
440 intervention involve careful screening prior to enrollment and careful monitoring after enrollment. In addition,  
441 estimates of the quantity of risk are given when data is available and the likely effectiveness of procedures to  
442 minimize risk is discussed when appropriate. In the event of an adverse effect necessitating medical or professional  
443 intervention, referral to the subject's primary care provider or an appropriate specialist will occur.

#### 444 *Adverse Event Reporting*

445

446 Safety-related events will be reported in a timely fashion as required by the Data and Safety Monitoring Board, the  
447 local IRB, and NIA. The study principal investigators will be directly responsible for identifying and reporting all  
448 serious adverse events, protocol deviations/violations and unanticipated events to the IRBs and funding agencies



449 promptly, as appropriate. Additionally, the DSMB will receive monthly reports of SAEs.

450

451

452

## 453 **Study Procedures**

454

### 455 **Procedures**

456 Potentially eligible patients will be sent emails directing them to the Way to Health website. Participants will be  
457 required to sign up online and complete the screening questionnaire where they will be asked to document their  
458 previous weight loss. The screening questionnaire has been attached.

459 Participants will be asked to electronically sign the consent and complete the demographic survey on the  
460 platform. Participants will then be randomized to one of two study arms. Immediately following  
461 randomization, each participant will receive a description of her assigned treatment condition by email and on the  
462 study websites dashboard (See Control and Escalating Lottery dashboard instructions attached). Participants will  
463 self-monitor their weights daily. Every day, at a time convenient for the participant, participants  
464 will weigh themselves using the internet-enabled scale. The scale will wirelessly transmit their weight data  
465 where it will be stored on the Way to Health portal. Each week, subjects will be text paged with feedback on  
466 their progress relative to their weekly goal. Participants in the escalating lottery arm will be eligible for a weekly  
467 lottery with an expected value of \$3.98 in week 1 that will increase by \$0.43 per week if, prior to resolution of the  
468 lottery, they weighed in 6 out of 7 days the prior week. If participants in the escalating rewards arm miss the  
469 target in a given week, they will go back to the beginning of the escalating rewards schedule, with one  
470 exception: participants will be given the opportunity to return to their previous place in the schedule if  
471 they meet goals the following week.

472 The lottery provides both infrequent large payoffs (a 1 in 100 chance at a \$110 reward in week 1) and frequent  
473 small payoffs (an 18 in 100 chance at a \$16 reward in the week 1) since subjects are motivated by both the future  
474 (fixation on large potential winnings) and the past (how often did I win?). Participants in the lottery arm will be  
475 asked to pick a 2-digit number upon entry into the study, e.g. 27. A two digit random number will be  
476 generated for each week. If the random number includes one digit, either a 2 or 7 in the same position as the

477 participant's number (an 18 in 100 chance), and the subject weighed in at least 6 days that week, s/ he wins a small  
478 reward. If the random number matches 27 exactly (a 1 in 100 chance) the subject wins the large reward.  
479 When a subject does not meet their goal of weighing in 6/7 days in a week, we will  
480 still generate a 2-digit daily number and tell the subject if s/he would have won the lottery that week if s/he had  
481 weighed in at least 6 out of 7 days. We believe that a desire to avoid the regret associated with not winning  
482 combined with learning that one would have won, had one been adherent, will motivate participants to a greater  
483 degree than only on the value of the rewards. Other than the total number of lottery weeks (24), there is no  
484 limit to the number of times a person could win the daily lottery if their number comes up; however, for  
485 participants who make all of their weekly goals for the entire 6 months (24 weeks) of the intervention, the  
486 expected value of the lottery is approximately \$214.

487 All participants will be required to complete online surveys at months 6 and 12. Participants will receive  
488 automated emails/text messages from the Way to Health platform notifying them of their compensation  
489 payment for completing each of the required surveys at months 6 and 12. Participants will receive \$50 for surveys  
490 at months 6 and 12. All payments will be approved electronically from the Way to Health platform. Payment  
491 information will be sent to Wells Fargo to process and send to participants via check every week. Between months  
492 7-12 (Phase II), participants will not receive incentives tied to weighing in to evaluate sustainability of effects  
493 achieved in Phase I.

494  
495

#### 496 **Subject Privacy**

497 Potential participants will be identified by reviewing Weight Watchers records using the inclusion criteria. Weight  
498 Watchers will facilitate communication to these members using existing communication channels (email).

499 Interested participants will be directed to the Way to Health portal where they will be asked to enter data related to  
500 eligibility and their demographic characteristics. Enrollment will include a description of the voluntary nature of  
501 participation, the study procedures, risks and potential benefits in detail. The enrollment procedure will provide the  
502 opportunity for potential participants to ask questions and review the consent form information with family and  
503 friends prior to making a decision to participate. Participants will be told that they do not have to answer any  
504 questions if they do not wish and can drop out of the study at any time, without affecting their medical care or the

505 cost of their care. They will be told that they may not benefit directly from the study and that all information will  
506 be kept strictly confidential, except as required by law. Subjects will be given a copy of the consent document. All  
507 efforts will be made by study staff to ensure subject privacy.

508

509

510

511

## 512 **Consent**

513

### 514 *Consent Process*

515

### 516 **Overview**

517 Potential participants will be identified by reviewing Weight Watchers records using our eligibility criteria.

518 Weight Watchers will facilitate communication to these members using existing communication channels (email).

519 Potentially eligible individuals will be invited to visit the WTH portal. Potentially eligible individuals will enroll

520 directly through the WTH platform, which steps them through screening and consent process electronically.

521

522

### 523 **Risk / Benefit**

524

#### 525 **Potential Study Risks**

526 The incentive programs could be detrimental to individuals with certain psychiatric issues such as bulimia  
527 nervosa or gambling disorder. We will screen for and exclude people with these disorders during recruitment.

528 Because of the low prevalence of these disorders in our target population, we anticipate this to be an

529 infrequent occurrence. The main risk is loss of confidentiality, which will be protected as described below.

530 Database Security/Protection against Risk. To assure that patient, physician and other informant confidentiality

531 is preserved, individual identifiers (such as name and medical record number/physician billing identifier) are

532 stored in a single password protected system that is accessible only to study research, analysis and IT staff.

533 This system is hosted on site at The University of Pennsylvania (UPenn) and is protected by a secure firewall.  
534 Once a participant is in this system, they will be given a unique study identification number (ID). Any datasets  
535 and computer files that leave the firewall will be stripped of all identifiers and individuals will be referred to by  
536 their study ID. The study ID will also be used on all analytical files. Additionally, any information that leaves this  
537 system to communicate with third party data sources (biometrics devices, survey software, etc.) will be stripped of  
538 any identifiers and transmitted in encrypted format. The same unique study ID will be used to link these outside  
539 data to the participants. Social security numbers, bank account and routing numbers for all participants to whom  
540 payments are sent will also be transmitted in encrypted format to UPenn's Financial Systems/Comptrollers  
541 Department where data will be stored for compliance with W-9 form reporting requirements. After the social  
542 security numbers are no longer needed they will be deleted from our system. The Way to Health (WTH)  
543 Research Data Center staff is responsible for preventing unauthorized access to the trial participant tracking  
544 system database. It is important to note that the Way to Health database server and individual study databases  
545 have never been compromised as a result of the extremely rigorous and secure network firewall technologies.  
546 The secure servers are located in a specially designed, highly secured facility at UPenn with dedicated  
547 uninterrupted power supply and strictly limited access. The study will utilize a client-server deployed Data  
548 Management System (DMS) rather than a 'Store and Forward' database configuration, obviating research site  
549 database security concerns. Confidential participant information will be entered into the database. Thereafter,  
550 confidential information will be made available to authorized users only as specifically needed. No one can  
551 gain access to an individual MySQL database table unless explicitly granted a user ID, password, and specific  
552 access. Even those with user names and passwords cannot gain access to the tables that contain the identifying  
553 participant information. No results will be reported in a personally identifiable manner. All tracking system data  
554 will be password-protected with several levels of protection. The first will allow access to the operating system  
555 of the computer. The second will allow access to the basic menus of the integrated system; within certain  
556 menu options, such as database browsing, a third password will be required. Our prior research employing  
557 similar precautions has demonstrated that these techniques are very successful in assuring the protection of  
558 subjects. The same procedure used for the analysis of automated data sources to ensure protection of patient  
559 information will be used for the survey data, in that patient identifiers will be used only for linkage purposes or  
560 to contact patients. The study identification number, and no other identifying information, will be used on all data

561 collection instruments. All study staff will be reminded to appreciate the confidential nature of the data collected  
562 and contained in these databases. In order to monitor for excessive weight loss, the CRC will be sent an alert if a  
563 participant loses more than 10pounds in one week and/or 20 pounds in one month. In all such instances the  
564 participant will be contacted to screen for unsafe weight loss behaviors. The PIs will review all such cases.

565

#### 566 **Potential Study Benefits**

567 This study proposes to focus on the effectiveness of financial incentives as a means of encouraging weight  
568 maintenance in obese volunteers. Given the lack of effective approaches to maintenance of weight loss, the  
569 proposed study will contribute to the field by examining the effectiveness of an innovative incentive design that  
570 involves study-provided incentives for frequent weighing of oneself and its possible effects on  
571 weight loss maintenance. This type of intervention could help ameliorate disparities in health outcomes because  
572 obesity is more prevalent in minority populations and is a major risk factor for adverse health events. This approach  
573 has potentially broad generalizability in treating the obesity epidemic nationally, as these types of financial  
574 incentives could be set up by insurers and broadly utilized. As stated previously, findings from this important  
575 research will provide further information concerning the management of obesity and maintenance of weight loss.

576

#### 577 **Dissemination**

578 Results of the study will be made public using [clinicaltrials.gov](http://clinicaltrials.gov), manuscript publication, and presentations at health  
579 conferences. The policy implications of this work call for a dissemination strategy that goes beyond presentations at  
580 health professional meetings and publication in scholarly journals. Our dissemination activities are designed to reach  
581 specific audiences of leading figures in health care delivery with information they can use, and we will utilize the  
582 expertise of the Advisory Board of the LDI CHIBE, which was designed with this in mind.

583

584

585

586

587

588

589  
590  
591  
592  
593  
594  
595  
596  
597  
598  
599  
600  
601  
602  
603  
604  
605  
606  
607  
608  
609  
610  
611  
612  
613  
614  
615  
616  
617  
618  
619  
620  
621  
622  
623  
624  
625  
626  
627  
628  
629  
630  
631  
632

Appendix: Informed Consent Form

**UNIVERSITY OF PENNSYLVANIA RESEARCH SUBJECT INFORMED CONSENT & HIPAA AUTHORIZATION FORM**

**Protocol Title: A randomized trial of financial incentives for maintenance of weight loss part II**

**Principal Investigators:** Kevin Volpp, MD, PhD/ William Yancy, MD, MHSc

**Contact:** 215-746-8439

**Why am I being asked to volunteer?**

You are being invited to participate in a research study. You are being invited because you meet the initial requirements for enrollment in this study, including that you have recently lost about 11 pounds of weight in the past 4-6 months and have an online Weight Watchers membership. Your participation in this study is voluntary, which means you can choose whether or not you want to participate. Before you can make your decision, you will need to know what the study is about, the possible risks and benefits of being in this study, and what you will be asked to do in this study. The following screens will explain the study in detail. After reviewing this information, you will see an option to click links to participate in the study or to not participate. If you choose to participate in this study, you may withdraw at any time.

**What is the purpose of this research study?**

The purpose of the study is to learn more about effective ways to maintain weight loss in adults. We will test different strategies for helping people maintain weight loss.

**How long will I be in the study? How many people will be in the study?**

The study will last 52 weeks (12 months). You will be one of 258 people in the study.

633  
634  
635  
636  
637  
638  
639  
640  
641  
642  
643  
644  
645  
646  
  
647

**What am I being asked to do?**

During the enrollment process, you will complete an online questionnaire that will ask you some questions about your age, gender and health. You do not have to answer any questions which make you feel uncomfortable. This online survey will take about 10 minutes.

You will be "randomized" into one of 2 research study groups. Randomization means that you are put into a group by chance. A computer program will place you in one of the research groups. Neither you nor the researchers can choose the group you will be in.

For 12 months, participants in each of the 2 groups will weigh themselves daily at home with a wireless scale that we will provide to you at no charge. You will be asked to weigh in daily, striving to weigh in at least 6 out of 7 days per week.

648  
649  
650  
651  
652  
653  
654  
655

You will have a personalized web portal that you will log into that will allow you to track your weight, and your progress towards meeting your weight loss goals. The study website will also send you weekly messages regarding your goals.

At the end of months 6 and 12, you will be asked to complete an online survey that will take approximately 20 minutes to complete.

656  
657  
658

**What are the possible risks or discomforts?**

If you lose weight rapidly, there are potential medical risks to very rapid weight loss. Risks of rapid weight loss include: gallstones (signs of gallstones can include pain in your upper right abdomen, nausea and vomiting, fever, or changes in the color of your urine or stool), constipation, diarrhea, hair loss, loss of electrolytes that can lead to heart arrhythmias, malnourishment and feeling too cold. Study staff will monitor your weight and notify the study clinician if you have lost a large amount of weight rapidly. In this case, the study team may ask you to talk to your primary care doctor.

In addition, it is possible that if you do not meet your weekly weighing goal you may experience some disappointment.

You cannot be in this study if you are pregnant or if you become pregnant during the study. This is because weight loss is generally not recommended during pregnancy.

672  
673  
674  
675  
676

In addition, although the study takes a number of steps to prevent risks of participation, it is always possible that there are additional risks that we are unaware of. If we learn about additional risks during the study, we will tell you about them.

677  
678  
679  
680

Study staff will be available to discuss any concerns you may have about your participation in the study. Contact information for these individuals is listed at the beginning of this consent form.. If for any reason you are not comfortable discussing your concerns with study staff directly, the staff can help you find appropriate contact information for other counseling services

681 provided by your health insurance.

682

683

684 **What if new information becomes available about the study?**

685

686 During the course of this study, we may find out information that could be important to you. We  
687 will notify you as soon as possible if such information becomes available. You will always have  
688 the right to change your mind about being in this study.

689

690

691 **What are the possible benefits of the study?**

692

693 Participation in this study may help you to lose weight or maintain weight you have already lost,  
694 which could improve your health and reduce your risk of diseases such as diabetes, heart  
695 disease, arthritis, and certain kinds of cancer. If this program is effective, it could help other  
696 people lose weight.

697

698

699 **What other choices do I have if I do not participate?**

700

701 You can choose not be in the study.

702

703 If you choose not to be in the study you may always consult with your primary care doctor  
704 and/or your Weight Watchers program leader regarding appropriate weight loss and  
705 maintenance strategies as well as other programs that are available.

706

707

708 **Will I be paid for being in this study?**

709

710 Everyone in this study will have the opportunity to earn a total of \$100 for completing online  
711 surveys at months 6 and 12. In addition, some participants may earn additional money if they  
712 successfully weigh in 6 out of 7 days each week.

713

714 In order to be paid for participating in this study, you will be asked to provide your Social  
715 Security number. The University of Pennsylvania requires that we collect Social Security  
716 numbers for all research participants who get paid for being in a research study. You do not  
717 have to provide your Social Security number, but if you choose not to, you will not be able to  
718 participate in the study.

719

720 Payment received as compensation for participation in research is considered taxable income to  
721 the research subject. If payment to an individual is \$600 or more in any one calendar year, the  
722 University of Pennsylvania is required to report this information to the Internal Revenue Service  
723 (IRS). Research participant payments of \$600 or more during any calendar year will result in a  
724 1099 (Miscellaneous Income) form being issued to the individual and a copy sent to the IRS.

725

726

727 **Will I have to pay for anything?**

728

729 If you choose to receive messages from Way to Health by text message you will be responsible  
730 for the costs associated with the receipt of these messages. For example, if you have a monthly  
731 text messaging plan, these messages will count towards your monthly text messaging total. If



732 you do not have a plan, you will be charged the standard text messaging fees by your wireless  
733 provider. You may receive a maximum of 35 text messages from Way to Health each month.  
734 You can edit your Way to Health profile or contact the study coordinator at any point during the  
735 study to change your notification preferences. If you would rather receive messages via email,  
736 you can select this preference at any time.

737  
738

### 739 **When is the Study over? Can I leave the Study before it ends?**

740

741 The study is expected to end after all participants have completed all visits and all the  
742 information has been collected. The planned duration for each individual is 52 weeks (12  
743 months). Your participation in the study may be terminated without your consent for the  
744 following reasons:

745 • The Principal Investigator feels it is best for your safety and/or health. If this is the  
746 reason for termination you will be informed of the reasons why.

747 • You have not followed the study instructions.

748 • The Principal Investigator, the sponsor, or the Office of Regulatory Affairs at the  
749 University of Pennsylvania can stop the study anytime.

750

751 You have the right to drop out of the research study at any time during your participation. There  
752 is no penalty or loss of benefits to which you are otherwise entitled if you decide to do so.  
753 Withdrawal will not interfere with your future health care or your relationship with Weight  
754 Watchers.

755

756 If you no longer wish to be in the research study, please contact the study Project Manager, Tori  
757 Hilbert by phone at 215-746-8439 or by email at [ulrichv@mail.med.upenn.edu](mailto:ulrichv@mail.med.upenn.edu) and take the  
758 following steps:

759 • Discuss your reasons for leaving the study with the Study Project Manager.

760 • Provide a brief written statement indicating that you would like to exit the study.

761

762 There are no negative consequences for leaving the study early.

763

764

### 765 **Use of Study Materials**

766

767 Information about you that is collected during the study will not be given to others (unless it is  
768 required by a government agency or other legal authority). This means that no one (not your  
769 family, your doctor, your insurance company, or your employer) will have access to this  
770 information during the study.

771

772

### 773 **Who can see or use my information? How will my personal information be protected?**

774

775 The Principal Investigators (Kevin Volpp, MD, PhD, William Yancy, MD, MHSc) and staff  
776 involved with the study will keep your personal information strictly confidential. It will be kept in a

777 secured, password-protected file at the University of Pennsylvania. At any time, you may ask to  
778 see your personal information (such as name and address) and correct it if necessary.  
779

780

### 781 **What information about me may be collected or shared with others?**

782

783 Weight Watchers will provide your weight information to the University of Pennsylvania to  
784 support the study. In addition, information about your weights and weight loss activities during  
785 the study will be combined with information from other people in the study. This information will  
786 be used to learn about which methods of encouraging weight loss and maintenance are most  
787 effective.  
788

789

We will collect information about your:

790

- Name, address, email address, social security number, and telephone number

791

- Weight, height

792

- Personal characteristics such as age, gender, and income

793

- Dietary habits and level of physical activity

794

- Weight Watchers member ID number

795

796

This personal information will not be shared with your healthcare providers, your insurance  
797 company, or your employer. When you sign this consent form, you agree to have your personal  
798 and medical information used as described here.  
799

800

We may post positive feedback you give the study team anonymously (without using your  
801 name) on the University of Pennsylvania Way to Health marketing website. Additionally, we  
802 may use the anonymous feedback in presentations.  
803

804

### 804 **Who, outside of the University of Pennsylvania, might receive my information?**

805

806

- Wells Fargo (We will share your Social Security Number, Name, and Address with Wells  
807 Fargo in order to coordinate your payments)

808

809

- Withings (to record your weight from the wireless scale. Withings may also ask you to  
809 provide your name and date of birth to create an account, but we will not be collecting  
810 this information). You can access privacy information on Withings website:

811

<http://www.withings.com/en/wirelessscale/faq>:

812

813

- Twilio Cloud Communication (We will only provide your phone number to send you text  
813 messages. You will only receive study related text messages)

814

815

- Qualtrics (We won't be sharing any of your information with Qualtrics. We will only be  
815 interacting with Qualtrics to use their online survey service and to collect your answers to  
816 survey questions)

817

- Weight Watchers (to facilitate their provision of weight information to us)

- 818
- Penn Approved Data Center

819  
820

821 **Why is my information being collected, and how will it be used?**

822

823 Your personal information will be used by the research team to contact you during the study.

824 Your responses to questionnaires and results of weigh-ins will be used to:

825

- Do the research

826

- Oversee the research

827

- Make sure the research was done correctly

828

- Ensure that money for your participation in the research is sent to you

829

830

831 **How long may the University of Pennsylvania use or disclose my personal health**  
832 **information?**

833

834 Your authorization for use of your personal health information for this specific study does not  
835 expire.

836

837 Your information will be held in the research database. However, the University of Pennsylvania  
838 may not re-use or disclose information collected in this study for a purpose other than this study  
839 unless:

840

- You have given written authorization

841

- The University of Pennsylvania Institutional Review Board grants permission

842

- As permitted by law

843

844

845 **Can I change my mind about giving permission for use of my information?**

846

847 Yes. You may withdraw or take away your permission to use and disclose your health  
848 information at any time. You do this by sending written notice to the study PI. If you withdraw  
849 your permission, you will not be able to stay in this study.

850

851

852 **What if I decide not to give permission to use and give out my health information?**

853

854 Then you will not be able to be in this research study. You will be given a copy of this Informed  
855 Consent and Research Subject HIPAA Authorization describing your confidentiality and privacy  
856 rights for this study. By signing this document you are permitting the University of Pennsylvania  
857 to use and disclose personal health information collected about you for research purposes as  
858 described above.

859

860 **Who can I call with questions, complaints or if I'm concerned about my rights as a**

861 **research subject?**

862

863 If you have questions, concerns or complaints regarding your participation in this research study  
864 or if you have any questions about your rights as a research subject, you should speak with the  
865 Project Manager listed on Page 4 or the Principal Investigators listed on Page 1 of this form. If a  
866 member of the research team cannot be reached or you want to talk to someone other than  
867 those working on the study, you may contact the Office of Regulatory Affairs at the University of  
868 Pennsylvania with any questions, concerns or complaints by calling (215) 898-2614.

869

870 **Next steps**

871

872 When you click the "I want to participate" button below, you are agreeing to take part in this  
873 research study. This means that you have read the consent form, your questions have been  
874 answered, and you have decided to volunteer. Clicking the "I want to participate" button also  
875 means that you are permitting the University of Pennsylvania to use personal health information  
876 collected about you for research purposes within our institution.

877

878

879
