# Supplementary material for: Effect of Escalating Financial Incentive Rewards on Maintenance of Weight Loss: A Randomized Clinical Trial
Source: PubMed Central journal article supplement (PMC6826643; doi:10.1001/jamanetworkopen.2019.14393), 2019-11-01
Supplement: jamanetwopen-2-e1914393-s002.pdf [file jamanetwopen-2-e1914393-s002.pdf]

## **Data Sharing Statement**

Yancy, Jr. Effect of Escalating Financial Incentive Rewards on Maintenance of Weight Loss. *JAMA Netw Open*. Published November 01, 2019. 10.1001/jamanetworkopen.2019.14393

### **Data**

**Data available:** No
